# Supplementary material for: Quantitative Image Processing for Three-Dimensional Episcopic Images of Biological Structures: Current State and Future Directions
Source: Preprints.org preprint supplement (doi:10.20944/preprints202301.0456.v2), 2023-03-06
Supplement: Supplementary file 1 [file supplementary]

# Supplementary Materials

| Paper title                                                                                                                                                                 | Year | Contrast      | Structure | Model      | Annotation type         | Method of annotation                     | Type of quantification | Details of quantification                               | Software                | Online image repository                                          |
|-----------------------------------------------------------------------------------------------------------------------------------------------------------------------------|------|---------------|-----------|------------|-------------------------|------------------------------------------|------------------------|---------------------------------------------------------|-------------------------|------------------------------------------------------------------|
| Comparison of ex-vivo high-resolution episcopic microscopy with in-vivo four-dimensional high-resolution transvaginal sonography of the first-trimester fetal heart [32]    | 2011 | Eosin         | heart     | human      | Object detection        | Manual                                   | 2                      | Counts of identifiable structures                       | Unknown                 | <a href="http://www.embryoimaging.org">www.embryoimaging.org</a> |
| A chick embryo with a yet unclassified type of cephalothoracopagus malformation, a hypothesis for explaining its genesis [33]                                               | 2012 | Eosin         | embryo    | chick      | Segmentation, Detection | Semi-automatic skeletonization, Manual   | 5                      | Length measurements                                     | Amira                   | N/A                                                              |
| Congenital heart disease, the specification of left-right asymmetry [34]                                                                                                    | 2012 | EFIC          | heart     | mouse      | Object detection        | Manual                                   | 2                      | Phenotype counting                                      | Osirix                  | N/A                                                              |
| Dimensions of the Great Intrathoracic Arteries of Early Mouse Fetuses of the C57BL/6 Strain [35]                                                                            | 2012 | Eosin         | heart     | mouse      | Segmentation            | Manual                                   | 4                      | Diameter measurements at defined locations              | Amira                   | N/A                                                              |
| High-Resolution Episcopic Microscopy Data-Based Measurements of the Arteries of Mouse Embryos: Evaluation of Significance and Reproducibility under Routine Conditions [36] | 2012 | Eosin         | heart     | mouse      | Segmentation            | Manual, semi-automated protocol          | 4                      | Measurements at defined locations, virtual resectioning | Amira                   | N/A                                                              |
| IFT25 Links the Signal-Dependent Movement of Hedgehog Components to Intraflagellar Transport [37]                                                                           | 2012 | EFIC          | heart     | mouse      | Visualisation           | N/A                                      | N/A                    |                                                         | Volocity                | N/A                                                              |
| Lineage tree for the venous pole of the heart: clonal analysis clarifies controversial genealogy based on genetic tracing [38]                                              | 2012 | Eosin + X-gal | heart     | mouse      | Object detection        | Manual                                   | 2                      | Count of recombination event via X-gal labelling        | Osirix                  | N/A                                                              |
| Model-based vasculature extraction from optical fluorescence cryomicrotome images [26]                                                                                      | 2012 | Cryo          | heart     | pig        | Segmentation            | Frangi filtering, Intensity thresholding | 5                      | Skeletonisation of vessels                              | C, MATLAB, ImageJ, Fiji | N/A                                                              |
| Modifying transcript lengths of cycling mouse segmentation genes [39]                                                                                                       | 2012 | Eosin         | skeleton  | mouse      | Object detection        | Manual                                   | 1                      | Somite count                                            | ImageJ, Osirix          | N/A                                                              |
| Multiscale analysis of coronary branching, collateral connectivity: coupling vascular structure and perfusion in 3D [27]                                                    | 2012 | Fluorescence  | heart     | human, pig | Segmentation            | Frangi filtering                         | 5                      | Deconvolution, Frangi filtering                         | CUDA                    | N/A                                                              |
| Normal, abnormal development of the intrapericardial arterial trunks in humans, mice [40]                                                                                   | 2012 | Eosin         | heart     | mouse      | Segmentation            | Manual                                   | N/A                    |                                                         | Amira                   | N/A                                                              |

|                                                                                                                                                         |      |       |                 |              |                  |                                      |     |                                                         |                   |                                                                                                                                                                                                    |
|---------------------------------------------------------------------------------------------------------------------------------------------------------|------|-------|-----------------|--------------|------------------|--------------------------------------|-----|---------------------------------------------------------|-------------------|----------------------------------------------------------------------------------------------------------------------------------------------------------------------------------------------------|
| Three-dimensional, molecular analysis of the arterial pole of the developing human heart [41]                                                           | 2012 | Eosin | heart           | Human, mouse | Object detection | Manual                               | N/A |                                                         | Osirix, photoshop | N/A                                                                                                                                                                                                |
| A new definition of left ventricular compaction/noncompaction-the new gold-standard? [42]                                                               | 2013 | Eosin | heart           | mouse        | Segmentation     | Intensity based                      | 6   | Edge detection, fractal analysis                        | Unknown           | N/A                                                                                                                                                                                                |
| ARMC4 mutations cause primary ciliary dyskinesia with randomization of left/right body asymmetry [43]                                                   | 2013 | EFIC  | heart           | mouse        | Object detection | N/A                                  | N/A |                                                         | Osirix            | N/A                                                                                                                                                                                                |
| Interrogating congenital heart defects with noninvasive fetal echocardiography in a mouse forward genetic screen [44]                                   | 2013 | EFIC  | heart           | mouse        | Object detection | Other                                | 1   | Phenotype counting                                      | Unknown           | N/A                                                                                                                                                                                                |
| Metric characterization of the aortic arch of early mouse fetuses and of a fetus featuring a double lumen aortic arch malformation [45]                 | 2013 | Eosin | heart           | mouse        | Segmentation     | Manual, semi-automated protocol [46] | 4   | Diameter and area measurements                          | Amira             | N/A                                                                                                                                                                                                |
| Microcomputed Tomography Provides High Accuracy Congenital Heart Disease Diagnosis in Neonatal and Fetal Mice [47]                                      | 2013 | EFIC  | heart           | mouse        | Object detection | Manual                               | 2   | Phenotype counting                                      | Unknown           | N/A                                                                                                                                                                                                |
| The dermal arteries of the human thumb pad [10]                                                                                                         | 2013 | Eosin | dermal arteries | human        | Segmentation     | Manual                               | N/A | Manual vessel tracing                                   | Amira             | N/A                                                                                                                                                                                                |
| Ultra-high frequency ultrasound biomicroscopy and high throughput cardiovascular phenotyping in a large scale mouse mutagenesis screen [48]             | 2013 | EFIC  | heart           | mouse        | Visualisation    | Manual                               | N/A |                                                         | Unknown           | N/A                                                                                                                                                                                                |
| Wdpcp, a PCP protein required for ciliogenesis, regulates directional cell migration, cell polarity by direct modulation of the actin cytoskeleton [49] | 2013 | EFIC  | heart           | mouse        | Object detection | N/A                                  | N/A |                                                         | Unknown           | N/A                                                                                                                                                                                                |
| A detailed comparison of mouse and human cardiac development [50]                                                                                       | 2014 | EFIC  | heart           | mouse        | Object detection | N/A                                  | N/A |                                                         | Volocity, OpenLab | <a href="http://apps.dev.bio.pitt.edu/MouseAtlas">http://apps.dev.bio.pitt.edu/MouseAtlas</a> ,<br><a href="http://apps.dev.bio.pitt.edu/HumanAtlas">http://apps.dev.bio.pitt.edu/HumanAtlas</a> . |
| Advanced assessment of cardiac morphology and prediction of gene carriage by CMR in hypertrophic cardiomyopathy-the HCMNet/UCL collaboration [51]       | 2014 | Eosin | heart           | mouse        | Segmentation     | Fractal analysis                     | 6   | Fractal analysis (box counting)                         | Unknown           | N/A                                                                                                                                                                                                |
| Characterization of the vessel geometry, flow mechanics and wall shear stress in the                                                                    | 2014 | EFIC  | heart           | mouse        | Segmentation     | Level sets                           | 3   | Vascular modelling toolkit (VMTK) centerline prediction | python (VMTK)     | N/A                                                                                                                                                                                                |

|                                                                                                                                                                                 |      |       |                       |                             |                  |        |     |                           |               |     |
|---------------------------------------------------------------------------------------------------------------------------------------------------------------------------------|------|-------|-----------------------|-----------------------------|------------------|--------|-----|---------------------------|---------------|-----|
| great arteries of wildtype prenatal mouse [28]                                                                                                                                  |      |       |                       |                             |                  |        |     | and geometry calculations |               |     |
| High-Resolution Episcopic Microscopy (HREM): A Tool for Visualizing Skin Biopsies [9]                                                                                           | 2014 | Eosin | skin biopsy           | human                       | Object detection | Manual | N/A |                           | Amira         | N/A |
| High-resolution histological 3D-imaging: episcopic fluorescence image capture is widely applied for experimental animals [52]                                                   | 2014 | EFIC  | various               | Fish, mouse, chick, xenopus | Visualisation    | N/A    | N/A |                           | Unknown       | N/A |
| Multimodal Optical Microscopy Methods Reveal Polyp Tissue Morphology and Structure in Caribbean Reef Building Corals [53]                                                       | 2014 | EFIC  | polyp                 | coral                       | Visualisation    | Other  | N/A |                           | Imaris        | N/A |
| Serial sectioning, multispectral imaging system for versatile biomedical applications [8]                                                                                       | 2014 | Cryo  | organism              | Fish                        | Visualisation    | N/A    | N/A |                           | Unknown       | N/A |
| Simultaneous dermal matrix, autologous split-thickness skin graft transplantation in a porcine wound model: A three-dimensional histological analysis of revascularization [54] | 2014 | Eosin | skin                  | pig                         | Segmentation     | Manual | N/A |                           | Amira         | N/A |
| Tbx1 Coordinates Addition of Posterior Second Heart Field Progenitor Cells to the Arterial and Venous Poles of the Heart [55]                                                   | 2014 | Eosin | heart                 | mouse                       | Object detection | Manual | 1   | Phenotype counting        | Osirix        | N/A |
| The Development of Septation in the Four-Chambered Heart [56]                                                                                                                   | 2014 | Eosin | heart                 | mouse                       | Object detection | Manual | N/A |                           | Unknown       | N/A |
| Three-dimensional reconstruction of rat knee joint using episcopic fluorescence image capture [57]                                                                              | 2014 | EFIC  | knee joint            | rat                         | Segmentation     | Manual | 5   | Volume measurements       | Amira, Osirix | N/A |
| A unique set of centrosome proteins requires pericentrin for spindle-pole localization and spindle orientation [58]                                                             | 2015 | EFIC  | embryo                | mouse                       | Visualisation    | N/A    | N/A |                           | Unknown       | N/A |
| Clarifying the morphology of the ostium primum defect [59]                                                                                                                      | 2015 | Eosin | ostium primum (Heart) | mouse                       | Object detection | Manual | N/A |                           | Unknown       | N/A |
| High-resolution episcopic microscopy (HREM): A useful technique for research in wound care [60]                                                                                 | 2015 | Eosin | Skin/dermal grafts    | pig                         | Segmentation     | Manual | N/A |                           | Amira         | N/A |
| iASPP, a previously unidentified regulator of desmosomes, prevents arrhythmogenic                                                                                               | 2015 | Eosin | Heart                 | mouse                       | Visualisation    | N/A    | N/A |                           | Unknown       | N/A |

|                                                                                                                                                |      |         |                        |                |                         |        |     |                                                            |                     |                                                                                     |  |
|------------------------------------------------------------------------------------------------------------------------------------------------|------|---------|------------------------|----------------|-------------------------|--------|-----|------------------------------------------------------------|---------------------|-------------------------------------------------------------------------------------|--|
| right ventricular cardiomyopathy (ARVC)-induced sudden death [61]                                                                              |      |         |                        |                |                         |        |     |                                                            |                     |                                                                                     |  |
| Novel Jbts17 mutant mouse model of Joubert syndrome with cilia transition zone defects, cerebellar and other ciliopathy related anomalies [62] | 2015 | EFIC    | brain, skeleton        | mouse          | Visualisation           | Manual | 2   | Phenotype counting                                         | ImageJ or Osirix    | N/A                                                                                 |  |
| Physical factors affecting outflow facility measurements in mice [63]                                                                          | 2015 | EFIC    | eye                    | mouse          | Segmentation            | Manual | N/A |                                                            | Amira               | N/A                                                                                 |  |
| Postmortem high-resolution episcopic microscopy (HREM) of small human fetal hearts [64]                                                        | 2015 | Eosin   | heart                  | human          | Object detection        | Manual | N/A |                                                            | Unknown             | N/A                                                                                 |  |
| Sequential binding of MEIS1, NKX2-5 on the Popdc2 gene: a mechanism for spatiotemporal regulation of enhancers during cardiogenesis [14]       | 2015 | Eosin   | heart                  | mouse          | Visualisation           | N/A    | N/A |                                                            | Unknown             | N/A                                                                                 |  |
| Spatial change of cruciate ligaments in rat embryo knee joint by three-dimensional reconstruction [65]                                         | 2015 | EFIC    | cruciate ligament      | rat            | Segmentation            | Manual | 5   | Length measurements                                        | Amira               | N/A                                                                                 |  |
| The CXCL12/CXCR4 Axis Plays a Critical Role in Coronary Artery Development [66]                                                                | 2015 | Eosin   | Heart                  | mouse          | Object detection        | Manual | 1   | Phenotype counting                                         | Imaris              | N/A                                                                                 |  |
| The embryogenesis of the equine femorotibial joint: The equine interzone [67]                                                                  | 2015 | Eosin   | femorotibial interzone | horse          | Visualisation           | Manual | N/A |                                                            | Unknown             | N/A                                                                                 |  |
| 3D modelling, tissue-level morphology of trapeziometacarpal joint [68]                                                                         | 2016 | Unknown | TCM ligament           | human          | Segmentation            | Manual | N/A |                                                            | Unknown             | N/A                                                                                 |  |
| ASPP2 deficiency causes features of 1q41q42 microdeletion syndrome [69]                                                                        | 2016 | Eosin   | brain                  | mouse          | Object detection        | Manual | 1   | Phenotype counting                                         |                     | N/A                                                                                 |  |
| Clarification of mammalian cloacal morphogenesis using high-resolution episcopic microscopy [70]                                               | 2016 | EFIC    | cloaca                 | mouse          | Segmentation, Detection | Manual | 5   | Somite count                                               | Amira               | N/A                                                                                 |  |
| Comparing homologous microscopic sections from multiple embryos using HREM [71]                                                                | 2016 | Eosin   | embryo                 | mouse          | Object detection        | Other  | 3   | Affine deformation used to register multiple HREM datasets | ANTS                | <a href="https://data.mouseimaging.ca/HREM/">https://data.mouseimaging.ca/HREM/</a> |  |
| Developmental considerations with regard to so-called absence of the leaflets of the arterial valves [72]                                      | 2016 | Eosin   | Arterial valves        | human, mouse   | Object detection        | Manual | N/A |                                                            | Unknown             | DMDD                                                                                |  |
| Functional joint regeneration is achieved using reintegration mechanism in <i>Xenopus laevis</i> [73]                                          | 2016 | EFIC    | elbow joint            | xenopus laevis | Segmentation            | Manual | N/A |                                                            | Photoshop, Velocity | N/A                                                                                 |  |

|                                                                                                                                                                             |      |       |          |              |                         |                        |         |                                                         |                                  |                                                                           |
|-----------------------------------------------------------------------------------------------------------------------------------------------------------------------------|------|-------|----------|--------------|-------------------------|------------------------|---------|---------------------------------------------------------|----------------------------------|---------------------------------------------------------------------------|
| Genetic dissection of Down syndrome-associated congenital heart defects using a new mouse mapping panel [74]                                                                | 2016 | Eosin | heart    | mouse        | Segmentation            | Manual                 | 5       | Volume measurements, shape factor analysis              | ITKsnap, Volocity                | N/A                                                                       |
| High-throughput discovery of novel developmental phenotypes [75]                                                                                                            | 2016 | Eosin | embryo   | mouse        | Object detection        | Manual                 | N/A     |                                                         | Unknown                          | <a href="http://www.mousephenotype.org">http://www.mousephenotype.org</a> |
| Morphogenesis of myocardial trabeculae in the mouse embryo [76]                                                                                                             | 2016 | Eosin | heart    | mouse        | Segmentation            | Fractal                | 6       | Fractal analysis                                        | Osirix, Matlab                   | N/A                                                                       |
| Selective subepicardial localization of monocyte subsets in response to progressive coronary artery constriction [7]                                                        | 2016 | Cryo  | heart    | rabbit       | Segmentation            | Intensity thresholding | 5       | Volume measurements                                     | fiji                             | N/A                                                                       |
| The embryological basis of subclinical hypertrophic cardiomyopathy [21]                                                                                                     | 2016 | Eosin | heart    | human, mouse | Segmentation            | Fractal analysis       | 6       | Fractal analysis, radial spoke thickness of wall        | Osirix                           | N/A                                                                       |
| A predictive model of asymmetric morphogenesis from 3D reconstructions of mouse heart looping dynamics [25]                                                                 | 2017 | Eosin | heart    | mouse        | Segmentation            | Manual                 | 5, 7    | Geometry measurements on resectioned imaged             | Imaris, Icy, Blender             | N/A                                                                       |
| A staging system for correct phenotype interpretation of mouse embryos harvested on embryonic day 14 (E14.5) [77]                                                           | 2017 | Eosin | Forelimb | mouse        | Object detection        | Manual                 | 4       | Phenotyping according to protocol in [9]                | Amira, Osirix                    | DMDD                                                                      |
| Cellular and morphological characterization of blastoderms from freshly laid broiler eggs [78]                                                                              | 2017 | Eosin | embryo   | chick        | Object detection        | N/A                    | N/A     |                                                         | Amira, ImageJ                    | N/A                                                                       |
| Highly variable penetrance of abnormal phenotypes in embryonic lethal knockout mice [79]                                                                                    | 2017 | Eosin | embryo   | mouse        | Object detection        | Manual                 | 4       | Phenotyping according to DMDD method                    | Amira, Osirix, Pixmeo, photoshop | DMDD                                                                      |
| Morphology, topology and dimensions of the heart and arteries of genetically normal, mutant mouse embryos at stages S21-S23 [15]                                            | 2017 | Eosin | heart    | mouse        | Segmentation, Detection | Manual                 | 1, 5, 7 | Phenotyping according to DMDD method, pipeline from [9] | Amira, Osirix                    | DMDD                                                                      |
| Temporally Distinct Six2-Positive Second Heart Field Progenitors Regulate Mammalian Heart Development, Disease [80]                                                         | 2017 | Eosin | heart    | mouse        | Segmentation            | Manual                 | N/A     |                                                         | Amira                            | N/A                                                                       |
| Variation in the Three-Dimensional Histomorphometry of the Normal Human Optic Nerve Head With Age and Race: Lamina Cribrosa, Peripapillary Scleral Thickness, Position [81] | 2017 | EFIC  | eye      | human        | Segmentation            | Manual                 | 5       | Radius and thickness measurements                       | Visualization Toolkit            | N/A                                                                       |

|                                                                                                                                                               |      |       |                           |                                                       |                            |                                             |      |                                                                         |                   |      |
|---------------------------------------------------------------------------------------------------------------------------------------------------------------|------|-------|---------------------------|-------------------------------------------------------|----------------------------|---------------------------------------------|------|-------------------------------------------------------------------------|-------------------|------|
| WDR11-mediated Hedgehog signalling defects underlie a new ciliopathy related to Kallmann syndrome [82]                                                        | 2017 | Eosin | embryo                    | mouse                                                 | Object detection           | Manual                                      | 1    | Phenotype counting                                                      | Osirix            | N/A  |
| A simple setup for episcopic microtomy, a digital image processing workflow to acquire high-quality volume data, 3D surface models of small vertebrates [83]  | 2018 | Other | organism                  | alytes<br>obstetri<br>cans;<br>amphib<br>ian<br>Anura | Segmentation,<br>Detection | Manual                                      | 7    | Measurement of distances between fiducial markers after slice alignment | Amira,<br>ImageJ  | N/A  |
| Comparative study of regenerative effects of mesenchymal stem cells derived from placental amnion, chorion and umbilical cord on dermal wounds [84]           | 2018 | Eosin | skin wound                | mouse                                                 | Segmentation               | Manual                                      | N/A  |                                                                         | Amira             | N/A  |
| Effects of storage conditions on hatchability, embryonic survival and cytoarchitectural properties in broiler from young and old flocks [85]                  | 2018 | Eosin | egg                       | chick                                                 | Visualisation              | N/A                                         | N/A  |                                                                         | Unknown           | N/A  |
| Identification of trophectoderm-derived Cripto as an essential mediator of embryo implantation [86]                                                           | 2018 | Eosin | embryo                    | mouse                                                 | Visualisation              | Other                                       | N/A  |                                                                         | ImageJ,<br>Amira  | N/A  |
| Placentation defects are highly prevalent in embryonic lethal mouse mutants [87]                                                                              | 2018 | Eosin | embryo                    | mouse                                                 | Object detection           | Manual                                      | 1    | Phenotyping according to DMDD method                                    | Amira,<br>Osirix  | DMDD |
| Quantification of the detailed cardiac left ventricular trabecular morphogenesis in the mouse embryo [88]                                                     | 2018 | Eosin | heart                     | mouse                                                 | Segmentation               | Intensity thresholding,<br>fractal analysis | 5, 6 | Measurements of volume and surface area, fractal analysis               | ITKsnap,<br>Seg3D | N/A  |
| The dermal arteries in the cutaneous angiosome of the descending genicular artery [11]                                                                        | 2018 | Eosin | Dermal arteries           | human                                                 | Segmentation               | Manual                                      | 5    | Area and diameter measurements                                          | Amira             | N/A  |
| The Tomato <i>BLADE ON PETIOLE</i> and <i>TERMINATING FLOWER</i> Regulate Leaf Axil Patterning Along the Proximal-Distal Axes [89]                            | 2018 | Eosin | leaf                      | Tomato plant                                          | Visualisation              | Manual                                      | N/A  |                                                                         | Fiji,<br>Amira    | N/A  |
| A proof of concept study demonstrating that environmental levels of carbamazepine impair early stages of chick embryonic development [90]                     | 2019 | Eosin | embryo                    | chick                                                 | Visualisation              | N/A                                         | N/A  |                                                                         | Amira,<br>ImageJ  | N/A  |
| A Specific CNOT1 Mutation Results in a Novel Syndrome of Pancreatic Agenesis and Holoprosencephaly through Impaired Pancreatic, Neurological Development [91] | 2019 | Eosin | pancreas,<br>forebrain    | mouse                                                 | Segmentation               | Manual                                      | 5    | Volume measurements,<br>phenotype count                                 | Amira             | DMDD |
| Diminution of pharyngeal segmentation and the evolution of the amniotes [92]                                                                                  | 2019 | Eosin | pharyngeal arches (brain) | human                                                 | Visualisation              | Manual                                      | N/A  |                                                                         | Unknown           | DMDD |

|                                                                                                                                                             |      |              |                                                              |                                                       |                         |                   |     |                                                                                                      |                      |      |
|-------------------------------------------------------------------------------------------------------------------------------------------------------------|------|--------------|--------------------------------------------------------------|-------------------------------------------------------|-------------------------|-------------------|-----|------------------------------------------------------------------------------------------------------|----------------------|------|
| Elastic instability during branchial ectoderm development causes folding of the Chlamydosaurus erectile frill [93]                                          | 2019 | Eosin        | erectile ruff                                                | frilled dragon (Chlamydosaurus kingii)                | Segmentation            | Other             | 5   | 2D clustering                                                                                        | python, Amira        | N/A  |
| Furin, a transcriptional target of NKX2-5, has an essential role in heart development and function [94]                                                     | 2019 | Eosin        | heart                                                        | mouse                                                 | Object detection        | N/A               | 1   | Defect counting                                                                                      | Osirix, Pixmeo       | N/A  |
| Haemodynamic stress-induced breaches of the arterial intima trigger inflammation, drive atherogenesis [95]                                                  | 2019 | Eosin        | coronary artery                                              | human                                                 | Segmentation            | Intensity based   | 5   | Distribution of iron plaques                                                                         | Imaris               | N/A  |
| High-resolution episcopic microscopy enables three-dimensional visualization of plant morphology, development [96]                                          | 2019 | Eosin        | oil secretory cavity (citrus), adventitious root (persimmon) | plant woody plants: citrus fruit, persimmon rootstock | Visualisation           | Manual            | N/A |                                                                                                      | ImageJ, Amira        | N/A  |
| Myoarchitectural disarray of hypertrophic cardiomyopathy begins pre-birth [24]                                                                              | 2019 | Eosin        | heart orientation                                            | mouse                                                 | Segmentation            | Manual, Tensor    | 7   | structure tensor method used to find orientation of cardiomyocytes, wall thickness measured manually | Matlab, Fiji,        | N/A  |
| Pax9 is required for cardiovascular development and interacts with Tbx1 in the pharyngeal endoderm to control 4th pharyngeal arch artery morphogenesis [97] | 2019 | Eosin        | pharyngeal arches (heart)                                    | mouse                                                 | Segmentation            | Manual            | 1   | Phenotype counting                                                                                   | Amira, Osirix        | N/A  |
| Standardised imaging pipeline for phenotyping mouse laterality defects and associated heart malformations, at multiple scales and multiple stages [98]      | 2019 | Eosin        | heart                                                        | mouse                                                 | Segmentation            | Manual            | 1   | Defect counting                                                                                      | Imaris, Icy, Blender | N/A  |
| The Col4a2em1 (IMPC) Wtsi mouse line—lessons from the deciphering the mechanisms of developmental disorders (DMDD) program [99]                             | 2019 | Eosin        | embryo                                                       | mouse                                                 | Segmentation, Detection | Manual            | 1   | Phenotyping according to DMDD method                                                                 | Amira, Osirix        | DMDD |
| Asymmetric Point Spread Function Estimation and Deconvolution for Serial-Sectioning Block-Face Imaging [31]                                                 | 2020 | Fluorescence | brain + tumour                                               | mouse                                                 | Segmentation            | Tracing algorithm | 5   | PSF estimation, deconvolution, vessel radii measurements                                             | Vaa3D, Amira, imageJ | N/A  |

|                                                                                                                                                            |      |                         |                           |                 |                         |                          |         |                                                  |                      |      |
|------------------------------------------------------------------------------------------------------------------------------------------------------------|------|-------------------------|---------------------------|-----------------|-------------------------|--------------------------|---------|--------------------------------------------------|----------------------|------|
| Control of skeletal morphogenesis by the Hippo-YAP/TAZ pathway [100]                                                                                       | 2020 | Eosin                   | cleft palate              | mouse           | Segmentation, Detection | Intensity thresholding   | 5       | Length measurements                              | Analyze Direct       | N/A  |
| Diverse species-specific phenotypic consequences of loss of function sorting nexin 14 mutations [101]                                                      | 2020 | Eosin                   | Embryo                    | mouse           | Visualisation           | N/A                      | N/A     |                                                  | Amira                | N/A  |
| Early Embryonic Expression of <i>AP-2α</i> Is Critical for Cardiovascular Development [102]                                                                | 2020 | Eosin                   | pharyngeal arches (brain) | mouse           | Segmentation, Detection | Manual                   | 1       | Phenotype counting                               | Amira                | DMDD |
| High-resolution episcopic imaging for visualization of dermal arteries and nerves of the auricular cymba conchae in humans [103]                           | 2020 | Eosin                   | auricular cymba conchae   | human           | Segmentation            | Manual                   | 5       | Volume and distance measurements                 | 3D slicer            | N/A  |
| Identification, Morphogenesis of Vestibular Atrial Septal Defects [104]                                                                                    | 2020 | Eosin                   | heart                     | mouse           | Object detection        | Manual                   | N/A     |                                                  |                      | DMDD |
| Loss of extreme long-range enhancers in human neural crest drives a craniofacial disorder [105]                                                            | 2020 | Eosin + X-gal           | manible                   | mouse           | Visualisation           | N/A                      | N/A     |                                                  | Amira                | N/A  |
| <i>Pax9</i> and <i>Gbx2</i> Interact in the Pharyngeal Endoderm to Control Cardiovascular Development [106]                                                | 2020 | Eosin                   | pharyngeal arches (heart) | mouse           | Segmentation            | Manual                   | 1       | Phenotype counting                               | Amira, Osirix        | N/A  |
| Transient Nodal signaling in left precursors coordinates opposed asymmetries shaping the heart loop [107]                                                  | 2020 | Eosin + X-gal           | Heart                     | mouse           | Segmentation            | Manual                   | 5       | Principle component analysis of shape parameters | Imaris, Icy, Matlab  | N/A  |
| Vegetative propagation of elite Eucalyptus clones as food source for honeybees ( <i>Apis mellifera</i> ); adventitious roots versus callus formation [108] | 2020 | Eosin                   | roots                     | eucalyptus tree | Visualisation           | N/A                      | N/A     |                                                  | Amira                | N/A  |
| 4D formation of human embryonic forelimb musculature [109]                                                                                                 | 2021 | Eosin                   | upper forelimb            | human           | Object detection        | N/A                      | N/A     |                                                  | ImageJ, Osirix       | N/A  |
| Artefacts in Volume Data Generated with High Resolution Episcopic Microscopy (HREM) [110]                                                                  | 2021 | Eosin + acridine orange | embryo                    | mouse           | Object detection        | Manual                   | 2       | Artefact frequency count                         | Fiji                 | N/A  |
| Cross-Modality Imaging of Murine Tumor Vasculature—a Feasibility Study [111]                                                                               | 2021 | Eosin                   | tumour                    | mouse           | Segmentation            | Manual                   | 4       | Length and volume measurements                   | Amira                | N/A  |
| External surface anatomy of the postfolding human embryo: Computer-aided, three-dimensional reconstruction of printable digital specimens [112]            | 2021 | EFIC                    | embryo                    | human           | Segmentation            | Active contour, Manual   | N/A     |                                                  | ITK-SNAP             | DMDD |
| Functional analysis of a gene-edited mouse model to gain insights into the disease mechanisms of a titin missense variant [113]                            | 2021 | Eosin                   | heart                     | mouse           | Segmentation            | Fractal analysis, manual | 1, 4, 6 | Length and volume measurements, fractal analysis | Osirix, Horos, Amira | DMDD |

|                                                                                                                                                               |      |                         |                            |                  |                         |                                    |         |                                                                        |                                      |       |
|---------------------------------------------------------------------------------------------------------------------------------------------------------------|------|-------------------------|----------------------------|------------------|-------------------------|------------------------------------|---------|------------------------------------------------------------------------|--------------------------------------|-------|
| High Resolution Episcopic Microscopy for Qualitative and Quantitative Data in Phenotyping Altered Embryos and Adult Mice Using the New "Histo3D" System [114] | 2021 | Eosin + acridine orange | embryo                     | mouse            | Segmentation, Detection | Manual                             | 5       | Volume measurements                                                    | Avizo                                | N/A   |
| Histologic validation of optical coherence tomography-based three-dimensional morphometric measurements of the human optic nerve head: Methodology [115]      | 2021 | EFIC                    | eye                        | human            | Segmentation            | Other                              | 5       | Surface fitting using manual landmarks                                 | Visualization Toolkit                | N/A   |
| Hypoglossal Nerve Abnormalities as Biomarkers for Central Nervous System Defects in Mouse Lines Producing Embryonically Lethal Offspring [116]                | 2021 | Eosin                   | embryo (Hypoglossal Nerve) | mouse            | Segmentation, Detection | Manual                             | 1       | Phenotyping according to DMDD method                                   | Amira and Osirix                     | DMDD  |
| Imprinted Gene Expression, Function of the Dopa Decarboxylase Gene in the Developing Heart [117]                                                              | 2021 | EFIC                    | heart                      | mouse            | Visualisation           | N/A                                | N/A     |                                                                        | Volocity                             | N/A   |
| Msx1 haploinsufficiency modifies the Pax9-deficient cardiovascular phenotype [118]                                                                            | 2021 | Eosin                   | embryo heart               | mouse            | Segmentation, Detection | Manual                             | N/A     |                                                                        |                                      | yes   |
| Multi-fluorescence high-resolution episcopic microscopy (MF-HREM) for three dimensional imaging of adult murine organs [119]                                  | 2021 | Fluorescence            | kidney, brain, tumour      | mouse            | Segmentation, Detection | Intensity based, Tracing algorithm | 2, 5, 7 | Deconvolution, vessel tracing, calculation of white matter orientation | Vaa3D, Amira, ImageJ, python, Matlab | IDR   |
| Pathogenesis of Anorectal Malformations in Retinoic Acid Receptor Knockout Mice Studied by HREM [120]                                                         | 2021 | Eosin + acridine orange | embryo                     | mouse            | Segmentation, Detection | Manual                             | N/A     |                                                                        | Fiji                                 | N/A   |
| Reaction-diffusion in a growing 3D domain of skin scales generates a discrete cellular automaton [121]                                                        | 2021 | Eosin + acridine orange | skin                       | ocellated lizard | Segmentation            | Intensity based                    | 7       | Geometric data from images used in reaction-diffusion modelling        | Unknown                              | N/A   |
| SMCHD1 has separable roles in chromatin architecture, gene silencing that could be targeted in disease [122]                                                  | 2021 | Eosin                   | embryo                     | mouse            | Visualisation           | Manual                             | 4       | Length measurements                                                    | OsirixMD                             | DMDD  |
| Smooth Muscle Specific Ablation of CXCL12 in Mice Downregulates CXCR7 Associated with Defective Coronary Arteries, Cardiac Hypertrophy [123]                  | 2021 | Eosin                   | embryo                     | mouse            | Segmentation            | Manual                             | N/A     |                                                                        | Amira                                | N/A   |
| Miniseries 1—Part II: the comparative anatomy of the atrioventricular conduction axis [124]                                                                   | 2022 | Eosin                   | heart                      | mouse            | Visualisation           | N/A                                | N/A     |                                                                        |                                      | [125] |
| Analysis of placental arteriovenous formation reveals new insights into                                                                                       | 2022 | Eosin                   | placenta, heart            | mouse            | Segmentation            | Manual                             | 1, 4    | Volume estimations using stereology                                    | Amira, Horos                         | N/A   |

|                                                                                                                                                                                                           |      |                         |                      |              |                         |                 |      |                                                                     |              |       |
|-----------------------------------------------------------------------------------------------------------------------------------------------------------------------------------------------------------|------|-------------------------|----------------------|--------------|-------------------------|-----------------|------|---------------------------------------------------------------------|--------------|-------|
| embryos with congenital heart defects [126]                                                                                                                                                               |      |                         |                      |              |                         |                 |      | method from Coan 2014                                               |              |       |
| A three-dimensional, discrete-continuum model of blood flow in microvascular networks [16]                                                                                                                | 2022 | Fluorescence            | brain                | mouse        | Segmentation            | Manual          | 4, 7 | Skeletonised vessel network used for modelling blood flow           | Amira        | N/A   |
| Bcar1/p130Cas is essential for ventricular development and neural crest cell remodelling of the cardiac outflow tract [127]                                                                               | 2022 | Eosin                   | embryo heart         | mouse        | Segmentation            | Manual          | N/A  | manual                                                              | Amira        | N/A   |
| Detailed characterizations of cranial nerve anatomy in E14.5 mouse embryos/fetuses and their use as reference for diagnosing subtle, but potentially lethal malformations in mutants. [128]               | 2022 | Eosin                   | embryo cranial nerve | mouse        | Segmentation            | Manual          | 1, 4 | Phenotyping according to DMDD method, nerve diameter measurements   | Amira        | DMDD  |
| Detailed quantification of cardiac ventricular myocardial architecture in the embryonic, fetal mouse heart by application of structure tensor analysis to high resolution episcopic microscopic data [23] | 2022 | Eosin                   | embryo heart         | mouse        | Segmentation            | Intensity based | 6, 7 | Structure tensor method used to find orientation of cardiomycocytes | Fiji         | N/A   |
| Hinge point emergence in mammalian spinal neurulation [129]                                                                                                                                               | 2022 | Eosin                   | embryo               | mouse        | Visualisation           | N/A             | N/A  |                                                                     | Imaris 9.5.1 | N/A   |
| HREM, RNAseq, Cell Cycle Analyses Reveal the Role of the G2/M-Regulatory Protein, WEE1, on the Survivability of Chicken Embryos during Diapause [130]                                                     | 2022 | Eosin + acridine orange | embryo               | chicken      | Visualisation           | N/A             | N/A  |                                                                     | Amira        | N/A   |
| Inhibition of TGFB pathway prevents short body size, cardiac defects in Nipbl-deficient mice, a mouse model of Cornelia de Lange syndrome [131]                                                           | 2022 | Eosin                   | heart                | mouse        | Visualisation           | N/A             | N/A  |                                                                     | Imaris       | N/A   |
| Lem2 is essential for cardiac development by maintaining nuclear integrity [132]                                                                                                                          | 2022 | Eosin                   | heart                | mouse        | Visualisation           | N/A             | N/A  |                                                                     |              | N/A   |
| Miniseries 1—Part I: the Development of the atrioventricular conduction axis [133]                                                                                                                        | 2022 | Eosin                   | heart                | human        | Visualisation           | N/A             | N/A  |                                                                     |              | [125] |
| Morphogenesis of the Mammalian Aortic Arch Arteries [134]                                                                                                                                                 | 2022 | Eosin                   | embryo               | human, mouse | Segmentation, Detection | Manual          | N/A  |                                                                     | Amira        | N/A   |
| Novel Insights into the Etiology, Genetics, Embryology of Hypoplastic Left Heart Syndrome [135]                                                                                                           | 2022 | EFIC                    | heart                | mouse        | Visualisation           | N/A             | N/A  |                                                                     |              | N/A   |
| PKN2 deficiency leads both to prenatal 'congenital' cardiomyopathy, defective angiotensin II stress responses [136]                                                                                       | 2022 | Eosin + acridine orange | embryo, heart        | mouse        | Visualisation           | N/A             | N/A  |                                                                     | OsirisX      | DMDD  |

|                                                                                                                                     |      |                         |        |         |                         |        |      |                                                      |         |      |
|-------------------------------------------------------------------------------------------------------------------------------------|------|-------------------------|--------|---------|-------------------------|--------|------|------------------------------------------------------|---------|------|
| The Nanog epigenetic remodeling complex was essential to vertebrate mesoderm evolution [137]                                        | 2022 | Eosin                   | embryo | Axolotl | Visualisation           | N/A    | N/A  |                                                      |         | N/A  |
| The venous system of E14.5 mouse embryos—reference data, examples for diagnosing malformations in embryos with gene deletions [138] | 2022 | Eosin + acridine orange | embryo | mouse   | Segmentation, Detection | Manual | 1, 5 | Phenotype counting, length and diameter measurements | OsirisX | DMDD |

**Table S1.** Summary of papers included in meta-analysis.
